# Supplementary material
Source: PubMed Central journal article supplement (PMC9121842)
Supplement: bloodBLD2022015860-suppl1.pdf [file bloodBLD2022015860-suppl1.pdf]

## Supplemental data

### HLA-DQ Heterodimers in Hematopoietic-Cell Transplantation

Effie W. Petersdorf, M.D., Mats Bengtsson, M.D., Ph.D., Mary Horowitz, M.D., M.S., Caroline McKallor, M.S., Stephen R. Spellman, M.B.S., Eric Spierings, Ph.D., Ted Gooley, Ph.D., Phil Stevenson, M.S. on behalf of the International Histocompatibility Working Group in Hematopoietic-Cell Transplantation

### Table of Contents

**Supplemental Table 1.** Demographics of the Study Population

**Supplemental Table 2.** IHWG Participants

**Supplemental Table 3.** Patient and Donor Mismatches

**Supplemental Table 4.** Models for HLA-matched Transplantation

**Supplemental Table 5.** HLA-DR15 and G2 in HLA-matched Transplantation

**Supplemental Table 6.** Models for HLA-DQ-mismatched Transplantation

References for the Supplemental data

**Supplemental Table 1.** Demographics of the Study Population

| <b>Characteristic</b>                               | <b>HLA-A,-B,-C,-<br/>DRB1,-DQA1,-<br/>DQB1-matched<br/><i>n</i> = 5,164</b> | <b>One HLA-DQB1<br/>allele mismatch<br/>(HLA-A,-B,-C,-<br/>DRB1-matched)<br/><i>n</i> = 520</b> |
|-----------------------------------------------------|-----------------------------------------------------------------------------|-------------------------------------------------------------------------------------------------|
| Age, average yrs<br>(range)                         |                                                                             |                                                                                                 |
| Patient                                             | 39.0 (0.5 – 76.5)                                                           | 35.2 (0.3 – 72.7)                                                                               |
| Donor                                               | 35.1 (18.3 – 61.2)                                                          | 36.3 (18.7 – 61.2)                                                                              |
| Year of transplantation<br>– no. (%)                |                                                                             |                                                                                                 |
| 1988-1990                                           | 104                                                                         | 7                                                                                               |
| 1991-1995                                           | 573                                                                         | 55                                                                                              |
| 1996-2000                                           | 1,083                                                                       | 117                                                                                             |
| 2001-2005                                           | 1,986                                                                       | 207                                                                                             |
| 2006-2010                                           | 1,123                                                                       | 98                                                                                              |
| 2011-2016                                           | 295                                                                         | 36                                                                                              |
| Patient sex – no. (%)                               |                                                                             |                                                                                                 |
| Female                                              | 2,200                                                                       | 216                                                                                             |
| Male                                                | 2,963                                                                       | 304                                                                                             |
| Not specified                                       | 1                                                                           | 0                                                                                               |
| Donor sex – no. (%)                                 |                                                                             |                                                                                                 |
| Female                                              | 1,697                                                                       | 205                                                                                             |
| Male                                                | 3,417                                                                       | 313                                                                                             |
| Not specified                                       | 50                                                                          | 2                                                                                               |
| Disease – no. (%)                                   |                                                                             |                                                                                                 |
| ALL                                                 | 865                                                                         | 78                                                                                              |
| AML                                                 | 1,734                                                                       | 146                                                                                             |
| CML                                                 | 1,003                                                                       | 80                                                                                              |
| MDS                                                 | 892                                                                         | 80                                                                                              |
| Lymphoma*                                           | 423                                                                         | 45                                                                                              |
| Myeloma                                             | 6                                                                           | 4                                                                                               |
| Other malignant<br>blood disorders <sup>†</sup>     | 29                                                                          | 32                                                                                              |
| Other malignant<br>non-blood disorders <sup>‡</sup> | 3                                                                           | 1                                                                                               |
| Non-malignant <sup>§</sup>                          | 208                                                                         | 54                                                                                              |
| Not specified                                       | 1                                                                           | 0                                                                                               |
| Disease status <sup>¶</sup> - no.<br>(%)            |                                                                             |                                                                                                 |
| Early                                               | 2,015                                                                       | 176                                                                                             |

|                                                |       |     |
|------------------------------------------------|-------|-----|
| Intermediate                                   | 1,097 | 76  |
| Late                                           | 1,180 | 95  |
| Other                                          | 872   | 173 |
| Patient-Donor CMV serological status – no. (%) |       |     |
| Negative/Negative                              | 1,717 | 139 |
| Negative/Positive                              | 542   | 58  |
| Positive/Negative                              | 1,659 | 172 |
| Positive/Positive                              | 841   | 100 |
| Not specified                                  | 405   | 51  |
| Transplant type – no. (%)                      |       |     |
| Myeloablative                                  | 4,042 | 380 |
| Nonmyeloablative/<br>reduced intensity         | 950   | 110 |
| Not specified                                  | 172   | 30  |
| Source of cells – no. (%)                      |       |     |
| Bone marrow                                    | 2,865 | 308 |
| Peripheral blood stem cells                    | 2,274 | 210 |
| Bone marrow and peripheral blood stem cells    | 24    | 1   |
| Not specified                                  | 1     | 1   |
| Total body irradiation – no. (%)               |       |     |
| Yes                                            | 2,935 | 274 |
| No                                             | 2,213 | 236 |
| Not specified                                  | 16    | 10  |
| GVHD prophylaxis – no. (%)                     |       |     |
| Calcineurin-containing                         | 4,579 | 464 |
| Other <sup>II</sup>                            | 576   | 56  |
| Not specified                                  | 9     | 0   |
| T-cell depletion – no. (%)                     |       |     |
| Yes                                            | 1,615 | 192 |
| No                                             | 3,517 | 324 |
| Not specified                                  | 32    | 4   |
| DPB1 match status – no. (%)                    |       |     |

|                                           |       |     |
|-------------------------------------------|-------|-----|
| Matched                                   | 720   | 42  |
| One mismatch                              | 2,517 | 233 |
| Two mismatches                            | 1,306 | 169 |
| No data                                   | 621   | 76  |
| HLA-DQA1 matching in GVH vector           |       |     |
| Matched                                   | 5,164 | 433 |
| Number of unique HLA-DQ patient molecules |       |     |
| 1                                         | 532   | 0   |
| 2                                         | 3,208 | 324 |
| 4                                         | 1,424 | 196 |
| Patient HLA-DQ genotype                   |       |     |
| Group 1, Group 1                          | 1,691 | 182 |
| Group 1, Group 2                          | 2,573 | 271 |
| Group 2, Group 2                          | 900   | 67  |
| Patient genotype and mismatched molecule  |       |     |
| Group 1, Group 1 (Group 1 mismatch)       | 0     | 182 |
| Group 1, Group 2 (Group 1 mismatch)       | 0     | 148 |
| Group 1, Group 2 (Group 2 mismatch)       | 0     | 123 |
| Group 2, Group 2 (Group 2 mismatch)       | 0     | 67  |
| Matched                                   | 5,164 | 0   |
| Donor HLA-DQ genotype                     |       |     |
| Group 1, Group 1                          | 1,691 | 193 |
| Group 1, Group 2                          | 2,573 | 263 |
| Group 2, Group 2                          | 900   | 64  |

AML, acute myeloid leukemia; ALL, acute lymphoblastic leukemia; CML, chronic myeloid leukemia; MDS, myelodysplastic syndrome.

Variables are defined according to established definitions.<sup>1</sup>

\* Hodgkin lymphoma, non-Hodgkin lymphoma

† Other malignant blood disorders: other acute or chronic leukemia not otherwise specified.

‡ Other malignant non-blood disorders: breast cancer, renal carcinoma, rhabdomyosarcoma

§ Nonmalignant disorders: histiocytic disorders; inherited abnormality of erythrocyte differentiation or function; inherited disorder of metabolism; severe aplastic anemia; severe combined immunodeficiency and other immune system disorders, unspecified.

¶ Disease Status: early (first complete remission in AML or ALL; first chronic phase CML; refractory anemia; refractory anemia with ringed sideroblasts; refractory cytopenia with multilineage dysplasia; myelodysplastic syndrome); intermediate (second or higher complete remission in AML or ALL; second or higher chronic phase or accelerated phase in CML); late (primary induction failure; first or higher relapse in AML or ALL; blast phase CML; CMML; refractory anemia with excess blasts [RAEB]; RAEB in transformation (t); RAEB-1; RAEB-2; greater than 5% blasts in myelodysplastic syndrome); other (un-named myelodysplasia, myeloproliferative disorder).

|| Other GVHD prophylaxis regimens containing anti-lymphocyte globulin/serum, Campath, methotrexate, corticosteroids, sirolimus, mycophenolate mofetil. A total of 10 recipients received post-transplant cyclophosphamide.

## Supplemental Table 2. IHWG Participants

### Sweden

Mats Bengtsson, University of Uppsala, Uppsala

Kristina Carlson, University Hospital, Uppsala

### The Netherlands

De Stichting Hemato-Oncologie voor Volwassenen Nederland (The Haemato-Oncology Foundation for Adults in the Netherlands [HOVON])

Laura Bungener, University Medical Centre Groningen

Jan J. Cornelissen, Erasmus Medical Centre, Rotterdam and HOVON

Gerda Choi, University Medical Centre Groningen

Arjan C. Lankester, Leiden University Medical Centre

Neubery Lardy, Sanquin Blood Supply Foundation, Amsterdam

Ellen Meijer, VU University Medical Centre, Amsterdam

Machteld Oudshoorn, Leiden University Medical Centre and Matchis Foundation, Leiden

Eefke Petersen, University Medical Centre Utrecht

Nicholaas P M Schaap, University Medical Centre St Radboud, Nijmegen

Harry Schouten, University Medical Centre Maastricht

Eric Spierings, University Medical Centre Utrecht

Marcel Tilanus, University Medical Centre Maastricht

Arnold van de Meer, University Medical Centre St Radboud, Nijmegen

Hendrik Veelkens, Leiden University Medical Centre

József Zsiros, Academic Medical Centre, Amsterdam

### United States

Center for International Blood and Marrow Transplant Research (CIBMTR), Minneapolis

National Marrow Donor Program (NMDP), Minneapolis

Ted Gooley, Fred Hutchinson Cancer Research Center, Seattle

Mary Horowitz, Medical College of Wisconsin, Milwaukee

Mari Malkki, Fred Hutchinson Cancer Research Center, Seattle

Caroline McKallor, Fred Hutchinson Cancer Research Center, Seattle

Effie Petersdorf, Fred Hutchinson Cancer Research Center, Seattle

Bronwen Shaw, Medical College of Wisconsin, Milwaukee

Stephen Spellman, CIBMTR, Minneapolis

Phil Stevenson, Fred Hutchinson Cancer Research Center, Seattle

190 transplant centers within the CIBMTR network

### Supplemental Table 3. Patient and Donor Mismatches

Among 324 patients with one mismatched HLA-DQ molecule, the cis-encoded allele genotype is described by the group genotype G1G1, G1G2 and G2G2. When the mismatched HLA-DQ molecule is considered, a total of eight patient/donor genotype and mismatch combinations are possible. G1G2 patients may be mismatched for either the G1 or the G2 molecule (the mismatched molecule is underlined).

| Patient genotype and mismatched molecule | Donor genotype and mismatched molecule |               |              |      | Total |
|------------------------------------------|----------------------------------------|---------------|--------------|------|-------|
|                                          | <u>G1</u> G1                           | G <u>1</u> G2 | G1 <u>G2</u> | G2G2 |       |
| <u>G1</u> G1                             | 30                                     | -             | 2            | -    | 32    |
| <u>G1</u> G2                             | -                                      | 135           | -            | 13   | 148   |
| G1 <u>G2</u>                             | 23                                     | -             | 100          | -    | 123   |
| <u>G2</u> G2                             | -                                      | 3             | -            | 18   | 21    |
| Total                                    | 53                                     | 138           | 102          | 31   | 324   |

-, not applicable. Transplant pairs had only a single HLA-DQB1 allele mismatch at transplant.

**Supplemental Table 4.** Models for HLA-matched Transplantation

| <b>Model</b>                                                | <b>Population</b>                           | <b>Endpoint</b>       | <b>Group</b> | <b>Number</b> | <b>Hazard ratio (95% CI; P value)</b> |
|-------------------------------------------------------------|---------------------------------------------|-----------------------|--------------|---------------|---------------------------------------|
| Total number of HLA-DQ molecules in HLA-matched transplants | HLA-matched transplants<br><i>n</i> = 5,164 | Relapse               | One          | 495           | 1.0                                   |
|                                                             |                                             |                       | Two          | 3,036         | 1.23 (1.04 – 1.46; 0.02)              |
|                                                             |                                             |                       | Four         | 1,348         | 1.16 (0.96 – 1.39; 0.12)              |
|                                                             |                                             | Disease-free survival | One          | 532           | 1.0                                   |
|                                                             |                                             |                       | Two          | 3,200         | 1.08 (0.97 – 1.21; 0.16)              |
|                                                             |                                             |                       | Four         | 1,419         | 1.08 (0.96 – 1.22; 0.21)              |
|                                                             |                                             | Mortality             | One          | 532           | 1.0                                   |
|                                                             |                                             |                       | Two          | 3,208         | 1.05 (0.94 – 1.18; 0.38)              |
|                                                             |                                             |                       | Four         | 1,424         | 1.06 (0.94 – 1.20; 0.32)              |
|                                                             |                                             | II-IV Acute GVHD      | One          | 522           | 1.0                                   |
|                                                             |                                             |                       | Two          | 3,160         | 0.96 (0.80 – 1.16; 0.68)              |
|                                                             |                                             |                       | Four         | 1,390         | 0.96 (0.78 – 1.18; 0.72)              |
|                                                             |                                             | III-IV Acute GVHD     | One          | 508           | 1.0                                   |
|                                                             |                                             |                       | Two          | 3,093         | 0.88 (0.70 – 1.11; 0.29)              |
|                                                             |                                             |                       | Four         | 1,359         | 0.92 (0.71 – 1.19; 0.52)              |
|                                                             |                                             | Chronic GVHD          | One          | 521           | 1.0                                   |
|                                                             |                                             |                       | Two          | 3,140         | 0.85 (0.75 – 0.97; 0.02)              |
|                                                             |                                             |                       | Four         | 1,379         | 0.89 (0.77 – 1.02; 0.10)              |



|                                     |                                             |                   |      |       |                          |
|-------------------------------------|---------------------------------------------|-------------------|------|-------|--------------------------|
| Genotype in HLA-matched transplants | HLA-matched transplants<br><i>n</i> = 5,164 | Mortality         | G1G1 | 1,691 | 1.0                      |
|                                     |                                             |                   | G1G2 | 2,573 | 1.06 (0.98 – 1.14; 0.16) |
|                                     |                                             |                   | G2G2 | 900   | 1.07 (0.97 – 1.18; 0.19) |
|                                     |                                             | II-IV Acute GVHD  | G1G1 | 1,657 | 1.0                      |
|                                     |                                             |                   | G1G2 | 2,536 | 0.95 (0.84 – 1.08; 0.43) |
|                                     |                                             |                   | G2G2 | 879   | 0.92 (0.78 – 1.09; 0.33) |
|                                     |                                             | III-IV Acute GVHD | G1G1 | 1,613 | 1.0                      |
|                                     |                                             |                   | G1G2 | 2,484 | 0.95 (0.81 – 1.12; 0.54) |
|                                     |                                             |                   | G2G2 | 863   | 1.13 (0.92 – 1.39; 0.24) |
|                                     |                                             | Chronic GVHD      | G1G1 | 1,649 | 1.0                      |
|                                     |                                             |                   | G1G2 | 2,513 | 0.93 (0.85 – 1.02; 0.12) |
|                                     |                                             |                   | G2G2 | 878   | 1.00 (0.89 – 1.12; 0.96) |

### Supplemental Table 5. HLA-DR15 and G2 in HLA-matched Transplantation

Among HLA-A,-B,-C,-DRB1,-DQA1,-DQB1-matched unrelated donor/patient pairs, the hazard ratios of relapse and disease-free survival are shown according to the HLA-DQ genotype (G1G1, G1G2, G2G2) and presence of any number of DR15 (one or two) or absence of DR15. No patient/donor pair with the G1G1 genotype was DR15-positive. The effect of G2 on relapse is observed in DR15-negative patients in whom G1G2 genotype is associated with higher risk of relapse compared to G1G1 genotype. Further evidence of a lack of a DR15 effect on relapse is observed in comparisons among G1G2 patients with and without DR15 (†) and among G2G2 patients with and without DR15 (‡). A similar lack of a DR15 effect is observed for disease-free survival (§, ¶). Interaction P values are 0.92 for relapse and 0.39 for disease-free survival.

| Clinical endpoint     | Number | HLA-DQ genotype and presence of HLA-DR15 | Hazard ratio (95% CI; P value)* |
|-----------------------|--------|------------------------------------------|---------------------------------|
| Relapse               | 1,597  | G1G1 without DR15                        | 1.0                             |
|                       | 1,429  | G1G2 without DR15†                       | 1.20 (1.06 – 1.36; 0.003)       |
|                       | 1,005  | G1G2 with any DR15†                      | 1.22 (1.07 – 1.40; 0.004)       |
|                       | 283    | G2G2 without DR15‡                       | 1.19 (0.96 – 1.47; 0.11)        |
|                       | 565    | G2G2 with any DR15‡                      | 1.23 (1.05 – 1.44; 0.01)        |
|                       |        |                                          |                                 |
| Disease-free survival | 1,688  | G1G1 without DR15                        | 1.0                             |
|                       | 1,491  | G1G2 without DR15§                       | 1.04 (0.96 – 1.14; 0.32)        |
|                       | 1,075  | G1G2 with any DR15§                      | 1.12 (1.03 – 1.23; 0.01)        |
|                       | 309    | G2G2 without DR15¶                       | 1.11 (0.96 – 1.28; 0.15)        |
|                       | 588    | G2G2 with any DR15¶                      | 1.10 (0.99 – 1.23; 0.08)        |

\*Models adjusted for the transplant conditioning regimen, diagnosis, CMV serostatus, patient age, donor age, stem cell source, donor sex, patient sex, use of total body radiation, use of T-cell depletion, presence of DPB1 mismatching.

† Compared to G1G1 without DR15, G1G2 with any DR15 had a hazard ratio of relapse of 1.02 (1.22 divided by 1.20).

‡ Compared to G2G2 without DR15, G2G2 with any DR15 had a hazard ratio of relapse of 1.03 (1.23 divided by 1.19).

§ Compared to G1G1 without DR15, G1G2 with any DR15 had a hazard ratio of disease-free survival of 1.08 (1.12 divided by 1.04).

¶ Compared to G2G2 without DR15, G2G2 with any DR15 had a hazard ratio of disease-free survival of 0.99 (1.10 divided by 1.11).

**Supplemental Table 6.** Models for HLA-DQ-mismatched Transplantation

The mismatched molecule is underlined>.

| <b>Model</b> |                              | <b>Population</b>                            | <b>Endpoint</b>       | <b>Group</b>     | <b>Number</b> | <b>Hazard ratio<br/>(95% CI; P<br/>value)</b> |
|--------------|------------------------------|----------------------------------------------|-----------------------|------------------|---------------|-----------------------------------------------|
| A            | Number of patient mismatches | HLA-DQ-mismatched patients<br><i>n</i> = 520 | Relapse               | One mismatch     | 266           | 1.0                                           |
|              |                              |                                              |                       | Two mismatches   | 124           | 1.92 (0.94 – 3.91; 0.07)                      |
|              |                              |                                              |                       | Three mismatches | 34            | 1.89 (0.66 – 5.40; 0.23)                      |
|              |                              |                                              | Disease-free survival | One mismatch     | 316           | 1.0                                           |
|              |                              |                                              |                       | Two mismatches   | 147           | 1.46 (0.96 – 2.24; 0.08)                      |
|              |                              |                                              |                       | Three mismatches | 40            | 1.18 (0.61 – 2.30; 0.62)                      |
|              |                              |                                              | Mortality             | One mismatch     | 324           | 1.0                                           |
|              |                              |                                              |                       | Two mismatches   | 155           | 1.22 (0.79 – 1.86; 0.37)                      |

|   |                                 |                                              |                       |                     |     |                          |
|---|---------------------------------|----------------------------------------------|-----------------------|---------------------|-----|--------------------------|
|   |                                 |                                              |                       | Three mismatches    | 41  | 1.12 (0.56 – 2.21; 0.75) |
|   |                                 |                                              | II-IV Acute GVHD      | One mismatch        | 306 | 1.0                      |
|   |                                 |                                              |                       | Two mismatches      | 147 | 0.80 (0.41 – 1.55; 0.50) |
|   |                                 |                                              |                       | Three mismatches    | 41  | 2.54 (0.84 – 7.69; 0.10) |
|   |                                 |                                              | Chronic GVHD          | One mismatch        | 305 | 1.0                      |
|   |                                 |                                              |                       | Two mismatches      | 145 | 1.03 (0.64 – 1.66; 0.89) |
|   |                                 |                                              |                       | Three mismatches    | 41  | 1.67 (0.79 – 3.52; 0.18) |
| B | Number of patient G1 mismatches | HLA-DQ-mismatched patients<br><i>n</i> = 520 | Relapse               | Zero G1 mismatch    | 155 | 1.0                      |
|   |                                 |                                              |                       | One G1 mismatch     | 145 | 0.79 (0.53 – 1.20; 0.27) |
|   |                                 |                                              |                       | Two G1 mismatches   | 105 | 0.74 (0.46 – 1.18; 0.20) |
|   |                                 |                                              |                       | Three G1 mismatches | 19  | 1.20 (0.47 – 3.05; 0.70) |
|   |                                 |                                              | Disease-free survival | Zero G1 mismatch    | 184 | 1.0                      |
|   |                                 |                                              |                       | One G1 mismatch     | 174 | 0.80 (0.61 – 1.04; 0.09) |
|   |                                 |                                              |                       | Two G1 mismatches   | 123 | 0.80 (0.60 – 1.09; 0.16) |

|   |                                 |                                              |                       |                     |     |                          |
|---|---------------------------------|----------------------------------------------|-----------------------|---------------------|-----|--------------------------|
|   |                                 |                                              |                       | Three G1 mismatches | 22  | 0.78 (0.40 – 1.51; 0.46) |
|   |                                 |                                              | Mortality             | Zero G1 mismatch    | 190 | 1.0                      |
|   |                                 |                                              |                       | One G1 mismatch     | 180 | 0.87 (0.67 – 1.14; 0.31) |
|   |                                 |                                              |                       | Two G1 mismatches   | 128 | 0.85 (0.63 – 1.16; 0.31) |
|   |                                 |                                              |                       | Three G1 mismatches | 22  | 0.68 (0.33 – 1.39; 0.29) |
|   |                                 |                                              | II-IV Acute GVHD      | Zero G1 mismatch    | 184 | 1.0                      |
|   |                                 |                                              |                       | One G1 mismatch     | 166 | 1.13 (0.71 – 1.79; 0.61) |
|   |                                 |                                              |                       | Two G1 mismatches   | 122 | 0.87 (0.53 – 1.45; 0.60) |
|   |                                 |                                              |                       | Three G1 mismatches | 22  | 1.55 (0.53 – 4.57; 0.42) |
| C | Number of patient G2 mismatches | HLA-DQ-mismatched patients<br><i>n</i> = 520 | Relapse               | Zero G2 mismatch    | 269 | 1.0                      |
|   |                                 |                                              |                       | One G2 mismatch     | 121 | 1.25 (0.86 – 1.82; 0.25) |
|   |                                 |                                              |                       | Two G2 mismatches   | 19  | 1.60 (0.72 – 3.59; 0.25) |
|   |                                 |                                              |                       | Three G2 mismatches | 15  | 0.58 (0.17 – 2.00; 0.39) |
|   |                                 |                                              | Disease-free Survival | Zero G2 mismatch    | 319 | 1.0                      |
|   |                                 |                                              |                       | One G2 mismatch     | 142 | 1.20 (0.93 – 1.54; 0.16) |
|   |                                 |                                              |                       | Two G2 mismatches   | 24  | 1.73 (1.04 – 2.86; 0.03) |

|   |                  |                                       |                  |                     |     |                          |
|---|------------------|---------------------------------------|------------------|---------------------|-----|--------------------------|
|   |                  |                                       |                  | Three G2 mismatches | 18  | 1.15 (0.59 – 2.24; 0.68) |
|   |                  |                                       | Mortality        | Zero G2 mismatch    | 330 | 1.0                      |
|   |                  |                                       |                  | One G2 mismatch     | 144 | 1.17 (0.90 – 1.51; 0.25) |
|   |                  |                                       |                  | Two G2 mismatches   | 27  | 1.22 (0.74 – 2.03; 0.44) |
|   |                  |                                       |                  | Three G2 mismatches | 19  | 1.26 (0.64 – 2.47; 0.50) |
|   |                  |                                       | II-IV Acute GVHD | Zero G2 mismatch    | 310 | 1.0                      |
|   |                  |                                       |                  | One G2 mismatch     | 140 | 0.90 (0.58 – 1.39; 0.63) |
|   |                  |                                       |                  | Two G2 mismatches   | 25  | 0.75 (0.31 – 1.81; 0.52) |
|   |                  |                                       |                  | Three G2 mismatches | 19  | 2.67 (0.76 – 9.31; 0.12) |
| D | Patient genotype | One HLA-DQ-mismatch<br><i>n</i> = 324 | Mortality        | G1G1                | 32  | 1.0                      |
|   |                  |                                       |                  | G1G2                | 271 | 1.44 (0.88 – 2.37; 0.15) |
|   |                  |                                       |                  | G2G2                | 21  | 1.41 (0.68 – 2.90; 0.36) |
|   |                  |                                       | II-IV Acute GVHD | G1G1                | 31  | 1.0                      |
|   |                  |                                       |                  | G1G2                | 254 | 1.16 (0.53 – 2.52; 0.72) |
|   |                  |                                       |                  | G2G2                | 21  | 1.13 (0.35 – 3.65; 0.84) |
|   |                  |                                       | Chronic GVHD     | G1G1                | 32  | 1.0                      |

|   |                               |                                       |                  |              |     |                          |
|---|-------------------------------|---------------------------------------|------------------|--------------|-----|--------------------------|
|   |                               |                                       |                  | G1G2         | 252 | 0.96 (0.55 – 1.67; 0.89) |
|   |                               |                                       |                  | G2G2         | 21  | 1.00 (0.42 – 2.37; 1.0)  |
| E | Patient's mismatched molecule | One HLA-DQ-mismatch<br><i>n</i> = 324 | Mortality        | <u>G1</u> G1 | 32  | 1.0                      |
|   |                               |                                       |                  | <u>G1</u> G2 | 148 | 1.32 (0.79 – 2.19; 0.29) |
|   |                               |                                       |                  | G1 <u>G2</u> | 123 | 1.45 (0.86 – 2.44; 0.17) |
|   |                               |                                       |                  | <u>G2</u> G2 | 21  | 1.35 (0.66 – 2.74; 0.41) |
|   |                               |                                       | II-IV Acute GVHD | <u>G1</u> G1 | 31  | 1.0                      |
|   |                               |                                       |                  | <u>G1</u> G2 | 135 | 1.26 (0.56 – 2.83; 0.57) |
|   |                               |                                       |                  | G1 <u>G2</u> | 119 | 1.05 (0.46 – 2.40; 0.91) |
|   |                               |                                       |                  | <u>G2</u> G2 | 21  | 1.22 (0.38 – 3.85; 0.74) |
|   |                               |                                       | Chronic GVHD     | <u>G1</u> G1 | 32  | 1.0                      |
|   |                               |                                       |                  | <u>G1</u> G2 | 135 | 0.87 (0.49 – 1.53; 0.62) |
|   |                               |                                       |                  | G1 <u>G2</u> | 117 | 1.35 (0.76 – 2.40; 0.31) |
|   |                               |                                       |                  | <u>G2</u> G2 | 21  | 1.17 (0.51 – 2.70; 0.71) |



|   |                             |                                                                   |                       |                    |     |                          |
|---|-----------------------------|-------------------------------------------------------------------|-----------------------|--------------------|-----|--------------------------|
| F | Donor's mismatched molecule | Donors of the patients with one HLA-DQ mismatch<br><i>n</i> = 324 | Relapse               | <u>G1G1</u> donor  | 43  | 1.0                      |
|   |                             |                                                                   |                       | <u>G1G2</u> donor  | 112 | 2.05 (0.95 – 4.43; 0.07) |
|   |                             |                                                                   |                       | G1 <u>G2</u> donor | 84  | 2.70 (1.27 – 5.73; 0.01) |
|   |                             |                                                                   |                       | <u>G2G2</u> donor  | 27  | 1.47 (0.57 – 3.81; 0.43) |
|   |                             |                                                                   | Disease-free survival | <u>G1G1</u> donor  | 53  | 1.0                      |
|   |                             |                                                                   |                       | <u>G1G2</u> donor  | 133 | 1.38 (0.87 – 2.17; 0.17) |
|   |                             |                                                                   |                       | G1 <u>G2</u> donor | 100 | 1.56 (0.99 – 2.47; 0.06) |
|   |                             |                                                                   |                       | <u>G2G2</u> donor  | 30  | 1.29 (0.73 – 2.30; 0.38) |
|   |                             |                                                                   | Mortality             | <u>G1G1</u> donor  | 53  | 1.0                      |
|   |                             |                                                                   |                       | <u>G1G2</u> donor  | 138 | 1.14 (0.73 – 1.78; 0.58) |
|   |                             |                                                                   |                       | G1 <u>G2</u> donor | 102 | 1.22 (0.77 – 1.93; 0.40) |
|   |                             |                                                                   |                       | <u>G2G2</u> donor  | 31  | 1.16 (0.65 – 2.07; 0.61) |
|   |                             |                                                                   | II-IV Acute GVHD      | <u>G1G1</u> donor  | 52  | 1.0                      |
|   |                             |                                                                   |                       | <u>G1G2</u> donor  | 126 | 1.32 (0.64 – 2.74; 0.46) |
|   |                             |                                                                   |                       | G1 <u>G2</u> donor | 98  | 1.14 (0.54 – 2.40; 0.73) |
|   |                             |                                                                   |                       | <u>G2G2</u> donor  | 30  | 1.35 (0.53 – 3.44; 0.52) |

|   |                              |                 |                       |                          |     |                          |
|---|------------------------------|-----------------|-----------------------|--------------------------|-----|--------------------------|
|   |                              |                 | Chronic GVHD          | <u>G1</u> G1 donor       | 52  | 1.0                      |
|   |                              |                 |                       | <u>G1</u> G2 donor       | 126 | 0.92 (0.52 – 1.61; 0.76) |
|   |                              |                 |                       | G1 <u>G2</u> donor       | 97  | 1.68 (0.97 – 2.91; 0.07) |
|   |                              |                 |                       | <u>G2</u> G2 donor       | 30  | 1.70 (0.86 – 3.38; 0.13) |
| G | Specific patient G1 mismatch | One G1 mismatch | Relapse               | DQA1*02:01P-DQB1*03:03P  | 22  | 1.0                      |
|   |                              |                 |                       | DQA1*02:01P-DQB1*02:01P  | 16  | 1.75 (0.64 – 4.76; 0.27) |
|   |                              |                 |                       | DQA1*05:01P-DQB1*03:01P  | 11  | 0.72 (0.18 – 2.97; 0.65) |
|   |                              |                 |                       | DQA1*03:01P-DQB1*03:01P  | 31  | 0.55 (0.19 – 1.58; 0.27) |
|   |                              |                 |                       | DQA1*03:01P-DQB1*03:02P  | 46  | 0.62 (0.23 – 1.66; 0.34) |
|   |                              |                 | Disease-free Survival | DQA1*02:01P-DQB1*03:03P  | 28  | 1.0                      |
|   |                              |                 |                       | DQA1*02:01P-DQB1*02:01P  | 18  | 0.82 (0.42 – 1.61; 0.57) |
|   |                              |                 |                       | DQA1*05:01P-DQB1*03:01P  | 15  | 0.49 (0.22 – 1.11; 0.09) |
|   |                              |                 |                       | DQA1*03:01P-DQB1*03:01P  | 37  | 0.50 (0.27 – 0.93; 0.03) |
|   |                              |                 |                       | DQA1*03:01P-DQB1*03:02P  | 51  | 0.66 (0.38 – 1.15; 0.14) |
|   |                              |                 | Mortality             | DQA1*02:01P*-DQB1*03:03P | 29  | 1.0                      |
|   |                              |                 |                       | DQA1*02:01P-DQB1*02:01P  | 19  | 0.80 (0.40 – 1.60; 0.54) |

|   |                                 |                 |                     |                             |    |                             |
|---|---------------------------------|-----------------|---------------------|-----------------------------|----|-----------------------------|
|   |                                 |                 |                     | DQA1*05:01P-<br>DQB1*03:01P | 16 | 0.44 (0.18 –<br>1.05; 0.06) |
|   |                                 |                 |                     | DQA1*03:01P-<br>DQB1*03:01P | 38 | 0.56 (0.30 –<br>1.04; 0.07) |
|   |                                 |                 |                     | DQA1*03:01P-<br>DQB1*03:02P | 52 | 0.85 (0.49 –<br>1.47; 0.56) |
|   |                                 |                 | II-IV Acute<br>GVHD | DQA1*02:01P-<br>DQB1*03:03P | 25 | 1.0                         |
|   |                                 |                 |                     | DQA1*02:01P-<br>DQB1*02:01P | 16 | 0.31 (0.08 –<br>1.20; 0.09) |
|   |                                 |                 |                     | DQA1*05:01P-<br>DQB1*03:01P | 16 | 0.40 (0.10 –<br>1.56; 0.19) |
|   |                                 |                 |                     | DQA1*03:01P-<br>DQB1*03:01P | 36 | 0.34 (0.11 –<br>1.08; 0.07) |
|   |                                 |                 |                     | DQA1*03:01P-<br>DQB1*03:02P | 49 | 0.38 (0.13 –<br>1.15; 0.09) |
|   |                                 |                 | Chronic<br>GVHD     | DQA1*02:01P-<br>DQB1*03:03P | 27 | 1.0                         |
|   |                                 |                 |                     | DQA1*02:01P-<br>DQB1*02:01P | 17 | 0.59 (0.21 –<br>1.60; 0.30) |
|   |                                 |                 |                     | DQA1*05:01P-<br>DQB1*03:01P | 16 | 0.93 (0.37 –<br>2.31; 0.88) |
|   |                                 |                 |                     | DQA1*03:01P-<br>DQB1*03:01P | 34 | 0.66 (0.31 –<br>1.40; 0.27) |
|   |                                 |                 |                     | DQA1*03:01P-<br>DQB1*03:02P | 49 | 0.45 (0.21 –<br>0.96; 0.04) |
| H | Specific patient G2<br>mismatch | One G2 mismatch | Relapse             | DQA1*01:02P-<br>DQB1*06:02P | 23 | 1.0                         |
|   |                                 |                 |                     | DQA1*01:02P-<br>DQB1*06:03P | 23 | 1.20 (0.48 –<br>2.97; 0.70) |
|   |                                 |                 |                     | DQA1*01:02P-<br>DQB1*06:04P | 13 | 1.29 (0.48 –<br>3.49; 0.61) |

|  |  |  |                          |                             |    |                             |
|--|--|--|--------------------------|-----------------------------|----|-----------------------------|
|  |  |  |                          | DQA1*01:02P-<br>DQB1*05:02P | 12 | 0.40 (0.08 –<br>1.91; 0.25) |
|  |  |  | Disease-free<br>survival | DQA1*01:02P-<br>DQB1*06:02P | 29 | 1.0                         |
|  |  |  |                          | DQA1*01:02P-<br>DQB1*06:03P | 26 | 1.19 (0.62 –<br>2.27; 0.60) |
|  |  |  |                          | DQA1*01:02P-<br>DQB1*06:04P | 16 | 1.42 (0.70 –<br>2.91; 0.33) |
|  |  |  |                          | DQA1*01:02P-<br>DQB1*05:02P | 14 | 0.90 (0.40 –<br>2.05; 0.81) |
|  |  |  | Mortality                | DQA1*01:02P-<br>DQB1*06:02P | 29 | 1.0                         |
|  |  |  |                          | DQA1*01:02P-<br>DQB1*06:03P | 26 | 1.30 (0.67 –<br>2.52; 0.43) |
|  |  |  |                          | DQA1*01:02P-<br>DQB1*06:04P | 16 | 0.94 (0.42 –<br>2.09; 0.87) |
|  |  |  |                          | DQA1*01:02P-<br>DQB1*05:02P | 14 | 1.01 (0.44 –<br>2.31; 0.99) |

\*The letter P following allele names (e.g. DQA1\*03:01P) reflects that that particular allele is the chosen representative for the group of alleles that produce the same protein sequence at the antigen binding site despite having different sequences at other places in the protein.<sup>2</sup>

### References for the Supplemental Data

1. Shaw, B.E. et al. Development of an unrelated donor selection score predictive of survival after HCT: donor age matters most. *Biol. Blood Marrow Transplant.* **24**,1049-1056 (2018).
2. Robinson, J. et al. The IPD and IMGT/HLA database: allele variant databases. *Nucleic Acids Res.* **43**, D423-431 (2015).
